# Supplementary material
Source: PubMed Central journal article supplement (PMC3682499)
Supplement: NIHMS103200-supplement-Merged_Tables_Figs.pdf [file NIHMS103200-supplement-Merged_Tables_Figs.pdf]

## SUPPLEMENTARY MATERIAL LEGEND

Suppl. table 1- Oligonucleotides used in this study. pSEB48 (p*PEX20*:Pex20-GFP) and pSEB116 (p*PEX20*:Pex20[K19R]-GFP) (described in [6]) are used as templates for site-directed mutagenesis, to generate the indicated plasmids.

Suppl. fig. -1 Working model: recycling or degradation (RADAR) as two alternative and functional pathways for removal of cargo-free receptors from the peroxisomal membrane. This study indicates an essential role of the residue Cys8 of Pex20p in its recycling to the cytosol after a round of import. Upon mutation of this residue, the receptor accumulates at the peroxisomal membrane and Lys19 is used as a site of conjugation to ubiquitin, eventually leading to its proteasomal degradation by the RADAR pathway. This pathway allows for some import as demonstrated by growth on oleate of the strain carrying the Pex20p(C8S) mutant.

| <b>Name</b>                | <b>Sequence (5' -&gt; 3')</b>          | <b>Template mutated</b> | <b>Construct generated</b>                       |
|----------------------------|----------------------------------------|-------------------------|--------------------------------------------------|
| 20( $\Delta$ 1-7).d        | GTTTGAATGTGTGGGCCCCGCCACAGCGCTAGA      | pSEB48,<br>pSEB116      | pSEB162 = pPEX20:Pex20( $\Delta$ 1-7)-GFP        |
| 20( $\Delta$ 1-7).r        | TCTAGCGCTGTGGCGGGCCCCACACATTCAAAC      |                         | pSEB163 = pPEX20:Pex20( $\Delta$ 1-7, K19R)-GFP  |
| 20( $\Delta$ 1-10).d       | TTAAGTGTTTGAATGGCCACCGCTCTAGATAATCTCA  | pSEB48<br>pSEB116       | pSEB164 = pPEX20:Pex20( $\Delta$ 1-10)-GFP       |
| 20( $\Delta$ 1-10).r       | TGAGATTATCTAGAGCGGTGGCCATTCAAACACTTAA  |                         | pSEB165 = pPEX20:Pex20( $\Delta$ 1-10,K19R)-GFP  |
| 20( $\Delta$ 1-16).d       | TTAAGTGTTTGAATGCTCAGCAAGAGAGTCGG       | pSEB48                  | pSEB166 = pPEX20:Pex20( $\Delta$ 1-16)-GFP       |
| 20( $\Delta$ 1-16).r       | CCGACTCTCTTGCTGAGCATTCAAACACTTAA       |                         |                                                  |
| 20( $\Delta$ 1-16, K19R).d | TTAAGTGTTTGAATGCTCAGCAGGAGAGTCGGGCAGGA | pSEB48                  | pSEB167 = pPEX20:Pex20( $\Delta$ 1-16, K19R)-GFP |
| 20( $\Delta$ 1-16, K19R).r | TCCTGCCCGACTCTCCTGCTGAGCATTCAAACACTTAA |                         |                                                  |
| 20(C8S).d                  | CTTCTAATGGCAGTAGTGGGCCCCGCCACAGCGCTAGA | pSEB48<br>pSEB116       | pSEB168 = pPEX20:Pex20(C8S)-GFP                  |
| 20(C8S).r                  | TCTAGCGCTGTGGCGGGCCCCACTACTGCCATTAGAAG |                         | pSEB169 = pPEX20:Pex20(C8S,K19R)-GFP             |

Léon and Subramani – **Supplementary Table 1**

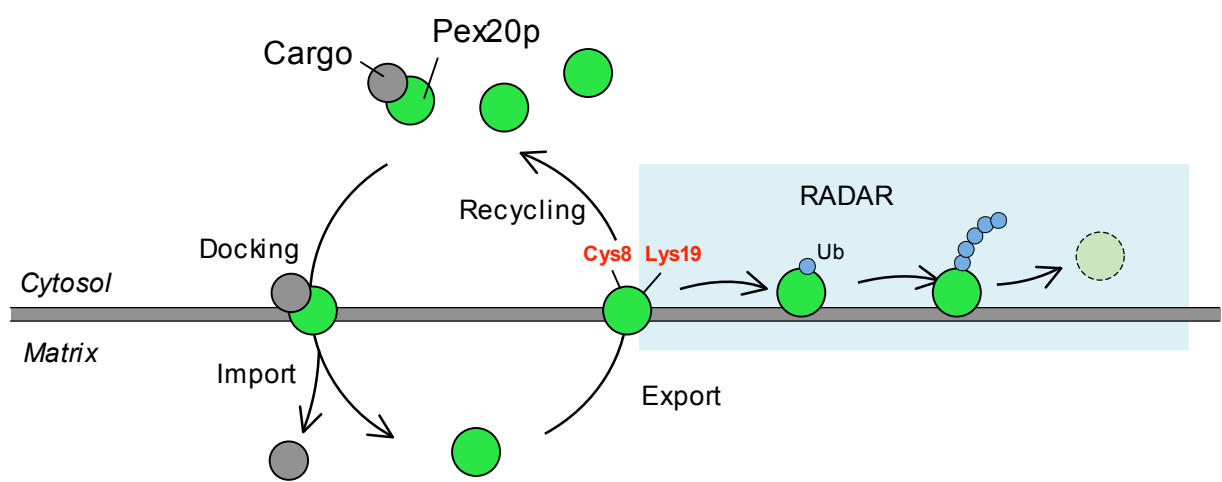

Léon and Subramani - Supplementary figure 1
